# Supplementary material
Source: publisher site journal article supplement (https://www.dovepress.com/article/309098)
Supplement: Supplementary file 1 [file get_supplementary_file.php]

Additional File 1 Risk consequences assessment table

|  |  |  | **CONSEQUENCE SCORES (SEVERITY LEVELS) AND QUALITATIVE MEASURES OF CONSEQUENCES OR IMPACT (ACTUAL / POTENTIAL)** | | | | |
| --- | --- | --- | --- | --- | --- | --- | --- |
|  |  |  | **INSIGNIFICANT / NEGLIGIBLE [1]** | **MINOR [2]** | **MODERATE [3]** | **MAJOR [4]** | **CATASTROPHIC [5]** |
| **RISK DOMAINS** | **1** | **SAFETY OF PATIENT, STAFF OR PUBLIC (PHYSICAL/PSYCHOLOGICAL HARM)** | » MINIMAL INJURY REQUIRING NO/MINIMAL INTERVENTION OR TREATMENT; » NO INCREASE IN LENGTH OF STAY; » NO TIME OFF WORK REQUIRED; » NO IMPAIRED PSYCHOLOGICAL FUNCTIONING. | **»** MINOR INJURY OR ILLNESS REQUIRING MINOR INTERVENTION OR FIRST AID; » INCREASE IN LENGH OF HOSPITAL STAY BY 1-3 DAYS; » TIME OFF WORK < 3 DAYS; » IMPAIRED PSYCHOLOGICAL FUNCTIONING GREATER THAN 3 DAYS LESS THAN 1 MONTH » ANY PATIENT SAFETY INCIDENT THAT REQUIRED EXTRA OBSERVATION OR MINOR TREATMENT; » AFFECTS 1-2 PEOPLE. | »UNEXPECTED TEMPORARY REDUCTION OF PATIENT’S BODILY FUNCTION UNRELATED TO THE NATURAL COURSE OF THE ILLNESS WHICH DIFFERS FROM THE EXPECTED OUTCOME, THAT NOT LEAD IN PERMANENT DISABILITY; » MODERATE INJURY OR ILLNESS REQUIRING PROFESSIONAL INTERVENTION; » INCREASE IN LENGH OF HOSPITAL STAY BY 4-15 DAYS; » TIME OFF WORK BY 4-14 DAYS; » AFFECTS 3-5 PEOPLE; » ANY PATIENT SAFETY INCIDENT THAT RESULTED IN A MODERATE INCREASE IN TREATMENT X AND WHICH CAUSED SIGNIFICANT BUT NOT PERMANENT HARM TO ONE OR MORE PERSONS; » IMPAIRED PSYCHOLOGICAL FUNCTIONING GREATER THAN ONE MONTH LESS THAN SIX MONTHS. | » MAJOR INJURY / LONG TERM INCAPACITY / DISABILITY (E.G. LOSS OF LIMB); »INCREASE IN LENGH OF HOSPITAL STAY >15 DAYS; » TIME OFF WORK BY >14 DAYS; » AFFECTS 16-50 PEOPLE; » IMPAIRED PSYCHOLOGICAL FUNCTIONING GREATER THAN SIX MONTHS. | » INCIDENT LEADING TO DEATH; »MULTIPLE PERMANENT INJURIES OR IRREVERSIBLE HEALTH EFFECTS; » FATALITIES; » AN EVENT AFFECTING >50 PEOPLE. » IPERMANENT PSYCHOLOGICAL FUNCTIONING INCAPACITY. |
| **2** | **PATIENT EXPERIENCE** | » REDUCED QUALITY OF PATIENT EXPERIENCE/CLINICAL OUTCOME NOT DIRECTLY RELATED TO DELIVERY OF CLINICAL CARE (I.E. INADEQUATE PROVISION OF INFORMATION). | » UNSATISFACTORY PATIENT EXPERIENCE/CLINICAL OUTCOME DIRECTLY DUE TO CLINICAL CARE PROVISIONE – READILY RESOLVABLE (I.E. UNSATISFACTORY RELATED TO LESS THAN OPTIMAL TREATMENT AND/OR INADEQUATE INFORMATION, NOT BEING TO TALKED TO AND TREADED AS AN EQUAL; OR NOT BEING TREATED WITH HONESTY, DIGNITY AND RESPECT - READLY RESOLVABLE); » INCREASE IN LENGTH OF HOSPITAL STAY BY 1-3 DAYS | » UNSATISFACTORY MANAGEMENT OF PATIENT CARE – LOCAL RESOLUTION (WITH POTENTIAL TO GO TO INDEPENDENT REVIEW); » SHORT TERM EFFECTS - INCREASED LENGTH OF HOSPITAL STAY BY 4-15 DAYS. | »UNSATISFACTORY MANAGEMENT OF PATIENT CARE WITH LONG TERM EFFECTS; »LONG TERM EFFECTS - INCREASED LENGTH OF HOSPITAL STAY >15 DAYS. | » TOTALLY UNSATISFACTORY LEVEL OR QUALITY OF TREATMENT / SERVICE. CONTINUED ONGOING LONG TERM EFFECTS. |
| **3** | **QUALITY AND PROFESSIONAL STANDARDS/GUIDELINES** | » MINOR NON-COMPLIANCE WITH INTERNAL STANDARDS, PROFESSIONAL STANDARDS, POLICY OR PROTOCOL. | » SINGLE FAILURE TO MEET INTERNAL PROFESSIONAL STANDARD OR FOLLOW PROTOCOL. | » REPEATED FAILURE TO MEET INTERNAL PROFESSIONAL STANDARDS OR FOLLOW PROTOCOLS. | » REPEATED FAILURE TO MEET REGIONAL/ NATIONAL STANDARDS;  » REPEATED FAILURE TO MEET PROFESSIONAL STANDARDS OR FAILURE TO MEET STATUTORY FUNCTIONS/ RESPONSIBILITIES. | » GROSS FAILURE TO MEET EXTERNAL/NATIONAL STANDARDS.  » GROSS FAILURE TO MEET PROFESSIONAL STANDARDS OR STATUTORY FUNCTIONS/ RESPONSIBILITIES. |
| **4** | **OBJECTIVES/PROJECTS DELIVERABLES, BUDGET AND TIME** | » INSIGNIFICANT COST INCREASE / SCHEDULE SLIPPAGE »INSIGNIFICANT SLIPPAGE OF THE PROJECT'S TIMES; » NOTICEABLE REDUCTION IN QUALITY/SCOPE. | » <5% OVER PROJECT BUDGET / SCHEDULE SLIPPAGE  » MINOR REDUCTION IN QUALITY/SCOPE. | » 5 - 10% OVER PROJECT BUDGET / SCHEDULE SLIPPAGE » SLITTAMENTO DELLA TEMPISTICA 5-10% RISPETTO AL BUDGET; »REDUCTION IN SCOPE OR QUALITY REQUIRING CLIENT APPROVAL | » 10 - 25% OVER PROJECT BUDGET / SCHEDULE SLIPPAGE » KEY OBJECTIVES NOT MET/SECONDARY OBJECTIVES | » >25% OVER PROJECT BUDGET / SCHEDULE SLIPPAGE; » KEY OBJECTIVES NOT MET/PRIMARY OBJECTIVES. |
| **5** | **BUSINESS CONTINUITY** | » INTERRUPTION IN A SERVICE WHICH DOES NOT IMPACT ON THE DELIVERY OF SERVICE USER CARE OR THE ABILITY TO CONTINUE TO PROVIDE SERVICE. » LOSS/INTERRUPTION OF >1 HOUR THAT NO IMPACT ON DELIVERY OF PATIENT CARE / ABILITY TO PROVIDE SERVICES | » SHORT TERM DISRUPTION TO SERVICE WITH MINOR IMPACT ON SERVICE USER CARE; » SHORT TERM DISRUPTION, OF >8 HOURS, WITH MINOR IMPACT; » SERVICE DISRUPTION CAUSING OPERATIONAL INCONVENIENCE. | » SOME DISRUPTION IN SERVICE WITH UNACCEPTABLE IMPACT ON SERVICE USER CARE. TEMPORARY LOSS OF ABILITY TO PROVIDE SERVICE; » LOSS / INTERRUPTION OF >1 DAY  » SERVICES INTERRUPTED NECESSITATING TEMPORARY WORKING ARRANGEMENTS FOR UP TO 24 HOURS. | » SUSTAINED LOSS OF SERVICE WHICH HAS SERIOUS IMPACT ON DELIVERY OF SERVICE USER CARE OR SERVICE RESULTING IN MAJOR CONTINGENCY PLANS BEING INVOLVED; » LOSS / INTERRUPTION OF > 1 WEEK.  » TEMPORARY SERVICE CLOSURE. | » PERMANENT LOSS OF CORE SERVICE OR FACILITY. » LDISRUPTION TO FACILITY LEADING TO SIGNIFICANT ‘KNOCK ON’ EFFECTACROSS LOCAL HEALTH ECONOMY; »EXTENDED SERVICE CLOSURE. |
| **6** | **ADVERSE PUBLICITY/REPUTATION** | » RUMOURS, NO MEDIA COVERAGE; » RUMOURS, LOCAL PRESS < 1 DAY COVERAGE; » LOCAL PUBLIC/POLITICAL CONCERN.  » INFORMAL CONTACT/POTENTIAL INTERVENTION BY ENFORCING AUTHORITY. | » LOCAL PUBLIC/POLITICAL CONCERN; » EXTENDED LOCAL PRESS < 7 DAY COVERAGE WITH MINOR EFFECT ON PUBLIC CONFIDENCE; » ADVISORY LETTER FROM ENFORCING AUTHORITY/INCREASED INSPECTION BY REGULATORY AUTHORITY; » INTERNAL REVIEW NECESSARY. | » REGIONAL PUBLIC/POLITICAL CONCERN; » REGIONAL/NATIONAL PRESS < 3 DAYS COVERAGE. » SIGNIFICANT EFFECT ON STAFF MORALE & PUBLIC PERCEPTION OF THE ORGANISATION. » IMPROVEMENT NOTICE/FAILURE TO COMPLY NOTICE; » COMPREHENSIVE REVIEW/INVESTIGATION NECESSARY. | » REGIONAL / NATIONAL MEDIA INTEREST >3 DAYS < 7DAYS. PUBLIC CONFIDENCE IN THE ORGANISATION UNDERMINED; »CRIMINAL PROSECUTION; » PROHIBITION NOTICE; » EXECUTIVE OFFICER DISMISSED; » EXTERNAL INVESTIGATION OR INDEPENDENT REVIEW; »MAJOR PUBLIC ENQUIRY. | » REGIONAL AND NATIONAL ADVERSE MEDIA PUBLICITY > 7 DAYS, WITH TOTAL LOSS OF PUBLIC CONFIDENCE; » CRIMINAL PROSECUTION; » EXECUTIVE OFFICER FINED OR IMPRISONED; » PUBLIC ENQUIRY. |
| **7** | **INFORMATION GOVERNANCE/INFORMATION TECHNOLOGY** | » BREACH OF CONFIDENTIALITY – NO ADVERSE OUTCOME; » UNPLANNED LOSS OF IT FACILITIES < HALF A DAY; » HEALTH RECORDS / DOCUMENTATION INCIDENT – NO ADVERSE OUTCOME. | » MINOR BREACH OF CONFIDENTIALITY – READILY RESOLVABLE;  » UNPLANNED LOSS OF IT FACILITIES < 1 DAY; » LOSS OF SYSTEM FOR SHORT PERIOD CAUSING DELAYS TO APPOINTMENTS OR PATIENT ACTIVITY; » EQUIPMENT FOUND IN EXPOSED OR INAPPROPRIATE LOCATIONS WHICH MAY RESULT IN THEFT OR DAMAGE; » DISCOVERY OF INADEQUATE RECORDS WHICH COULD HAVE RESULTED IN TREATMENT BEING APPROPRIATE; » INAPPROPRIATE OR UNAUTHORISED ACCESS TO SENSITIVE DATA BY STAFF DUE TO ACCIDENT OR HUMAN ERROR; » UNAUTHORISED USE OF COMPUTER EQUIPMENT FOR PERSONAL ACTIVITIES; » COMPUTER VIRUS INCIDENTS RESULTING IN LOSS OF STAFF TIME FOR RECOVERY BUT NO DATA LOSS. | » MODERATE BREACH OF CONFIDENTIALITY – COMPLAINT INITIATED; »UNPLANNED LOSS OF IT FACILITIES > 1 AND < 3 DAYS; »HEALTH RECORD - LOSS OF SYSTEM FOR UP TO 24 HOURS RESULTING IN DELAY OR CANCELLATION OF PATIENT APPOINTMENTS OR TREATMENT; » ACTUAL OR ATTEMPTED DELIBERATE UNAUTHORISED ACCESS TO HOSPITAL INFORMATION SYSTEMS; » UNAUTHORISED DISCLOSURE OF PATIENT DATA; » THEFT OF PC EQUIPMENT NOT INVOLVING THE LOSS OF SENSITIVE PATIENT DATA. | » SERIOUS BREACH OF CONFIDENTIALITY – MORE THAN ONE PERSON; » UNPLANNED LOSS OF IT FACILITIES > 3 AND < 7 DAYS; » HEALTH RECORD - LOSS OF SYSTEM > 24 AND < 48 HOURS RESULTING IN DELAY OR CANCELLATION OF PATIENT APPOINTMENTS OR TREATMENT; » THEFT OF A SERVER(S) CONTAINING APPLICATION PROGRAMMES AND/OR DATA, THEFT OF COMPUTER STORAGE MEDIA CONTAINING MEDICAL RECORDS OR PERSONAL DATA; » LOSS OF PATIENT DATA WHICH MAY RESULT IN EMBARRASSMENT TO THE ORGANIZATION OR FINANCIAL LITIGATION. | » SERIOUS BREACH OF CONFIDENTIALITY – LARGE NUMBERS; » UNPLANNED LOSS OF IT FACILITIES >1 WEEK; » HEALTH RECORD - LOSS OF SYSTEM > 48 HOURSRESULTING IN DELAY OR CANCELLATION OF PATIENT APPOINTMENTS OR TREATMENT; » UNRECOVERABLE LOSS OF PATIENT DATA OR ARCHIVE MATERIAL; » INACCURATE COMPUTER RECORDS RESULTING IN APPLICATION OF TREATMENT WHICH RESULTS IN DEATH OR INJURY. |
| **8** | **FINANCE AND ASSETS** | » SMALL LOSS OR DAMAGE OF ASSETS DUE TO PREMISES / PROPERTY; » THEFT OR DAMAGE OF PERSONAL PROPERTY <€50 | » DAMAGE THAT REQUIRES A SIMPLE REPLACEMENT OR REPAIR, IMPACT TO SERVICE IMMEDIATELY CONTAINABLE  » LOSS OF 0.1-0.25% OF BUDGET » THEFT OR LOSS OF PERSONAL PROPERTY <€750  » ABSORBABLE UNPLANNED EXPENDITURE OR LOSS OF INCOME €5.000 TO LESS THAN €50.000. | » DAMAGE IMPACT ON SERVICE CONTAINED WITH ADEGUATE ASSISTANCE; » LOSS OF 0,25-0,50% OF BUDGET » THEFT OR LOSS OF PERSONAL PROPERTY >750€ AND < 1.500€; » ABSORBABLE UNPLANNED EXPENDITURE OR LOSS OF INCOME €50.000 TO LESS THAN €500.000. | » DAMAGE IMPACT ON ABILITY TO PROVIDE SERVICES; » LOSS OF 0,50-1,00% OF BUDGET; » THEFT OR LOSS OF PERSONAL PROPERTY > 1.500€ AND < 3.000€; » UNPLANNED EXPENDITURE OR LOSS OF INCOME €500.000 TO LESS THAN €1.000.000; | » COLLAPSE OF SERVICE; » LOSS OF >1,00% OF BUDGET » THEFT OR LOSS OF PERSONAL PROPERTY > 3.000€; » UNPLANNED EXPENDITURE OR LOSS OF INCOME > € 1.000.000. |
| **9** | **COMPLAINTS/CLAIMS** | » INFORMAL / LOCALLY RESOLVED VERBAL COMPLAINT; » POTENTIAL FOR SETTLEMENT / LITIGATION <£500. | » OVERALL TREATMENT / SERVICE SUBSTANDARD » JUSTIFIED WRITTEN COMPLAINT, PERIPHERAL TO CLINICAL CARE; » MINOR IMPLICATIONS FOR PATIENT SAFETY IF UNRESOLVED; » CLAIM <€10.000. | » JUSTIFIED COMPLAINT INVOLVING LACK OF APPROPRIATE CARE; » CLAIM(S) BETWEEN € 10.000 E € 100.000;  » MAJOR IMPLICATIONS FOR PATIENT SAFETY IF UNRESOLVED. | » CLAIM ABOVE EXCESS LEVEL; » MULTIPLE JUSTIFIED COMPLAINTS;  » CLAIM(S) BETWEEN € 100.000 E € 1.000.000; » NON-COMPLIANCE WITH NATIONAL STANDARDS WITH SIGNIFICANT RISK TO PATIENTS IF UNRESOLVED. | » MULTIPLE CLAIMS OR SINGLE MAJOR CLAIM; » COMPLEX JUSTIFIED COMPLAINT; » CLAIM(S) > € 1.000.000; » INQUEST/OMBUDSMAN INQUIRY. |
| **10** | **STAFFING AND COMPETENCE** | » SHORT TERM LOW STAFFING LEVEL TEMPORARILY REDUCES SERVICE QUALITY <1 DAY; » SHORT TERM LOW STAFFING >1 DAY, WHERE THERE IS NO DISRUPTION TO PATIENT CARE; » LOW STAFF MORALE AFFECTING ONE PERSON. | » ONGOING LOW STAFFING LEVEL REDUCES SERVICE QUALITY; » MINOR ERROR DUE TO INEFFECTIVE TRAINING/IMPLEMENTATION OF TRAINING; » UNRESOLVED TREND RELATING TO COMPETENCY REDUCING SERVICE QUALITY; » 75% - 95% STAFF ATTENDANCE AT MANDATORY/KEY TRAINING; » LOW STAFF MORALE (1% - 25% OF STAFF). | » ONGOING PROBLEMS WITH STAFFING LEVELS; » MODERATE ERROR DUE TO INEFFECTIVE TRAINING / IMPLEMENTATION OF TRAINING; » LATE DELIVERY OF KEY OBJECTIVE / SERVICE DUE TO LACK OF STAFF; » 50% - 75% STAFF ATTENDANCE AT MANDATORY / KEY TRAINING; » LOW STAFF MORALE (25% - 50% OF STAFF). | » UNCERTAIN DELIVERY OF KEY OBJECTIVE / SERVICE DUE TO LACK OF STAFF; » SERIOUS ERROR DUE TO INEFFECTIVE TRAINING AND/OR  COMPETENCY; » VERY LOW STAFF MORALE (50% – 75% OF STAFF) » FAILURE TO ADHERE TO PRINCIPLES OF THE DUTY OF CANDOUR/BEING OPEN; »LOSS OF KEY STAFF; » UNSAFE STAFFING LEVEL >5DAYS. | » CRITICAL ERROR DUE TO INEFFECTIVE TRAINING / IMPLEMENTATION OF TRAINING AND/OR COMPETENCY; » NON-DELIVERY OF KEY OBJECTIVE / SERVICE DUE TO LACK OF STAFF; » LESS THAN 25% ATTENDANCE AT MANDATORY/KEY TRAINING ON AN ON-GOING BASIS; » LOSS OF SEVERAL KEY STAFF » VERY LOW STAFF MORALE (>75%); » ONGOING UNSAFE STAFFING LEVELS OR COMPETENCE. |
| **11** | **INSPECTION/AUDIT** | » SMALL NUMBER OF RECOMMENDATIONS, WHICH FOCUS ON MINOR QUALITY IMPROVEMENT ISSUES. | » RECOMMENDATIONS MADE, WHICH CAN BE ADDRESSED BY LOW LEVEL MANAGEMENT ACTION | » CHALLENGING RECOMMENDATIONS THAT CAN BE ADDRESSED WITH APPROPRIATE ACTION PLAN | » ENFORCEMENT ACTION; » LOW RATING;  » CRITICAL REPORT. | » PROSECUTION; » ZERO RATING; » SEVERELY CRITICAL REPORT. |
| **12** | **ENVIRONMENT** | » NEGLIGIBLE IMPACT. SPONTANEOUS RECOVERY BY NATURAL PROCESSES. NO DISRUPTION TO ACCESS OR EXPOSURE; » NUISANCE RELEASE. | » EMISSION OF NON-TOXIC MATERIALS; »LOW LEVEL IMPACT. QUICK RECOVERY WITH MINIMAL INTERVENTION. MINIMAL DISRUPTION TO ACCESS OR EXPOSURE; » MINOR DAMAGE TO HOSPITAL PROPERTY - EASILY REMEDIED <€10.000. | » MODERATE IMPACT. MEDIUM LEVEL INTERVENTION INDICATED TO BRING ABOUT RECOVERY. SHORT TO MEDIUM TERM RESTRICTION OF ACCESS OR EXPOSURE.  » SMALL EMISSION OF TOXIC MATERIAL; » MODERATE DAMAGE TO HOSPITAL PROPERTY – REMEDIED BY STAFF / REPLACEMENT OF ITEMS REQUIRED € 10.000 - € 50.000. | » HIGH LEVEL BUT RECOVERABLE, UNACCEPTABLE DAMAGE OR CONTAMINATION OF SIGNIFICANT RESOURCE OR AREA OF ENVIRONMENT. SIGNIFICANT INTERVENTION, PERMANENT CESSATION OF HARMFUL ACTIVITY. LONG TERM SUSPENDED ACCESS, PRESENCE OR USE OF RESOURCE; » LARGE EMISSION OF TOXIC MATERIAL; » MAJOR RELEASE AFFECTING MINIMAL OFF-SITE AREA REQUIRING EXTERNAL ASSISTANCE (FIRE BRIGADE, RADIATION, PROTECTION SERVICE ETC). | » EXTENSIVE VERY LONG TERM OR PERMANENT, SIGNIFICANT, UNACCEPTABLE DAMAGE TO OR CONTAMINATION OF SIGNIFICANT RESOURCE OR AREA OF ENVIRONMENT. VERY LONG TERM OR PERMANENT DENIAL OF ACCESS OR EXPOSURE; » TOXIC RELEASE AFFECTING OFF-SITE WITH DETRIMENTAL EFFECT REQUIRING OUTSIDE ASSISTANCE.  »LOSS OF BUILDING / MAJOR PIECE OF EQUIPMENT VITAL TO THE ORGANISATIONAL BUSINESS CONTINUITY |
| **13** | **FIRE SAFETY/GENERAL SECURITY (10)** | » MINOR SHORT TERM (<1DAY) SHORTFALL IN FIRE SAFETY SYSTEM; » SECURITY INCIDENT WITH NO ADVERSE OUTCOME. | » TEMPORARY (<1 MONTH) SHORTFALL IN FIRE SAFETY SYSTEM/SINGLE DETECTOR ETC (NON- PATIENT AREA); » SECURITY INCIDENT MANAGED LOCALLY; » CONTROLLED DRUG DISCREPANCY – ACCOUNTED FOR; | » FIRE CODE NON-COMPLIANCE / LACK OF SINGLE DETECTOR-PATIENT AREA ETC. » SECURITY INCIDENT LEADING TO COMPROMISED STAFF / PATIENT SAFETY. » CONTROLLED DRUG DISCREPANCY – NOT ACCOUNTED FOR | » SIGNIFICANT FAILURE OF CRITICAL COMPONENT OF FIRE SAFETY SYSTEM (PATIENT AREA); » SERIOUS COMPROMISE OF STAFF/PATIENT SAFETY. | » FAILURE OF MULTIPLE CRITICAL COMPONENTS OF FIRE SAFETY SYSTEM (HIGH RISK PATIENT AREA); »INFANT / YOUNG PERSON ABDUCTION. |
| **14** | **MEDICATION (10)** | » INCORRECT MEDICATION DISPENSED BUT NOT TAKEN. | » WRONG DRUG OR DOSAGE ADMINISTERED WITH NO ADVERSE EFFECTS. | » WRONG DRUG OR DOSAGE ADMINISTERED WITH POTENTIAL ADVERSE EFFECTS. | » WRONG DRUG OR DOSAGE ADMINISTERED WITH ADVERSE EFFECTS. | » WRONG DRUG OR DOSAGE ADMINISTERED WITH ADVERSE EFFECTS LEADING TO DEATH. |
| **15** | **KPI VARIATION** | » LESS THAN 2%. | » 2% - <5% | » 5% - <15% | » 15% - 30% | » 30% + |

Additional File 2 - Example of a risk register for an organizational unit

| **DATA ITEM** | **OGANIZATIONAL UNIT NAME** | **RISK ID** | **DATE RISK CREATED** | **RISK CATEGORY** | **RISK DESCRIPTION** | **RISK OWNER** |
| --- | --- | --- | --- | --- | --- | --- |
|
| Data field explanation |  | Unique identifier which identifies the risk |  | Risk categories listed in the Risk Matrix related risk areas | Description of the risk, possible causes and impacts. | Risk owner by position not name, only one risk owner for each risk |

Part 1/3

| **INHERENT RISK RATING** (Before controls or mitigating action) | | | | **CURRENT CONTROLS** (Existing controls that are in place) | | | **CURRENT RISK RATING** (After current controls) | | | |
| --- | --- | --- | --- | --- | --- | --- | --- | --- | --- | --- |
| Frequency | Likelihood | Consequency | Inherent Risk Level | Description | Type  (Proactive/Reactive) | Effectiveness  (Excellent, Adequate, Inadequate or Unknown) | Frequency | Likelihood | Consequency | Current Risk Level |

Part 2/3

| **ADDITIONAL CONTROLS/ACTION ITEMS TO MITIGATE RISKS** | | | | **RISK STATUS** |
| --- | --- | --- | --- | --- |
| Additional Description  (Identify and capture any further actions that need to be carried out to further reduce risk from “current risk rating” in order to manage the risk to an acceptable level) | Due Date  (Stipulate when the actions are due to be completed) | Responsible Position  (Risk owner by position not name responsible for implementation) | Target Risk  (Proposed risk rating after the implementation of mitigating actions) | Trend/Risk Status  (Current trend for the risk in terms of Decreasing, Increasing, No Change, Active or Not Active) |

Part 3/3
